# Supplementary material for: Preparedness and response against diseases with epidemic potential in the European Union: a qualitative case study of Middle East Respiratory Syndrome (MERS) and poliomyelitis in five member states
Source: Springer Nature journal article supplement (doi:10.1186/s12913-018-3326-0), 2018-07-06
Supplement: MOESM1 [file 15914002]

**Annex 1: Sectors and affiliations of the interviewees in the five participating countries**

| <b>MERS</b>   | <b>Health sector</b>                                                                                                                                                                                                                                                                                                                                                                                                                              | <b>Non-health sector</b>                                                                                                                                                                                                                                                                                                                        |
|---------------|---------------------------------------------------------------------------------------------------------------------------------------------------------------------------------------------------------------------------------------------------------------------------------------------------------------------------------------------------------------------------------------------------------------------------------------------------|-------------------------------------------------------------------------------------------------------------------------------------------------------------------------------------------------------------------------------------------------------------------------------------------------------------------------------------------------|
| <b>UK</b>     | <ul style="list-style-type: none"> <li>• Emerging Infections and Zoonoses Infectious Diseases Directorate, Department of Health</li> <li>• Preparedness &amp; Response, Respiratory Diseases Department, Public Health England</li> <li>• News Communications, Public Health England</li> <li>• National Ambulance Resilience Unit</li> <li>• University Tropical and Infectious Disease Unit</li> </ul>                                          | <ul style="list-style-type: none"> <li>• Department for Transportation</li> <li>• Civil Contingencies Secretariat, Cabinet Office</li> <li>• Animal Health and Veterinary Laboratories Agency</li> <li>• Medical Department, Civil Aviation Authority</li> <li>• Border Force Operations</li> <li>• Health and Science Correspondent</li> </ul> |
| <b>Greece</b> | <ul style="list-style-type: none"> <li>• National Focal Point for Preparedness, Ministry of Health</li> <li>• National Institute for Public Health (KEELPNO)</li> <li>• National Health Operations Centre, Ministry of Health</li> <li>• Hellenic Society of Travel Medicine</li> <li>• Infectious Disease Physician</li> <li>• Ambulance Services</li> </ul>                                                                                     | <ul style="list-style-type: none"> <li>• Airport Public Health Authority</li> <li>• Aviation Company Representative</li> <li>• Hellenic Civil Aviation Authority</li> <li>• Health Journalist</li> <li>• Ministry of Rural Development and Food</li> <li>• Ministry of Foreign Affairs, Crisis Management Unit</li> </ul>                       |
| <b>Spain</b>  | <ul style="list-style-type: none"> <li>• Coordinating Centre for Health Alerts and Emergencies, Ministry of Health</li> <li>• Press Office Directorate, Ministry of Health</li> <li>• Foreign Health and Border control, Ministry of Health</li> <li>• Ambulance services in an Autonomous Community</li> <li>• Infectious diseases specialist at University hospital</li> <li>• National Centre for Microbiology</li> <li>• Red Cross</li> </ul> | <ul style="list-style-type: none"> <li>• Animal Health, Ministry of Agriculture</li> <li>• Civil Protection</li> <li>• Ministry of Transport</li> <li>• Ministry of Foreign Affairs</li> <li>• Health Journalist</li> </ul>                                                                                                                     |

Preparedness and Response against Diseases with Epidemic Potential in the European Union  
 J Kinsman et al. (2018) BMC Health Services Research

| <u>Poliomyelitis</u> | Health sector                                                                                                                                                                                                                                                                                                                                                                                                                                                                                                                           | Non-health sector                                                                                                                                                                             |
|----------------------|-----------------------------------------------------------------------------------------------------------------------------------------------------------------------------------------------------------------------------------------------------------------------------------------------------------------------------------------------------------------------------------------------------------------------------------------------------------------------------------------------------------------------------------------|-----------------------------------------------------------------------------------------------------------------------------------------------------------------------------------------------|
| <b>Poland</b>        | <ul style="list-style-type: none"> <li>• Chief Sanitary Inspectorate</li> <li>• Department of Mother and Child, Ministry of Health</li> <li>• Department of Drug Policy and Pharmacy in the Ministry of Health</li> <li>• National Institute of Public Health</li> <li>• National Commission for the Certification of Poliomyelitis Elimination</li> <li>• Head, hospital ward</li> <li>• Regional laboratory</li> <li>• Consultant in Epidemiology</li> <li>• National Focal Point for the International Health Regulations</li> </ul> | <ul style="list-style-type: none"> <li>• Ministry of Foreign Affairs</li> <li>• Ministry of the Interior</li> <li>• Border Guard</li> <li>• Journalist</li> </ul>                             |
| <b>Cyprus</b>        | <ul style="list-style-type: none"> <li>• National Focal Point for Preparedness</li> <li>• Virology laboratory</li> <li>• National Certification Committee for Poliomyelitis Elimination</li> <li>• Government Immunization Centre, Hospital</li> <li>• Central Pharmacy</li> <li>• Infectious Disease physician</li> <li>• Ministry of Health planner</li> <li>• Cyprus Paediatric Society</li> <li>• Red Cross</li> </ul>                                                                                                              | <ul style="list-style-type: none"> <li>• Refugee center</li> <li>• Ministry of Foreign Affairs</li> <li>• Ministry of Justice – police/border control</li> <li>• Health journalist</li> </ul> |
